# Supplementary figures and images for: Bmi-1 plays a critical role in protection from renal tubulointerstitial injury by maintaining redox balance
Source: PubMed Central journal article supplement (PMC4331754; doi:10.1111/acel.12236), 2014-06-11

**Figure S1**

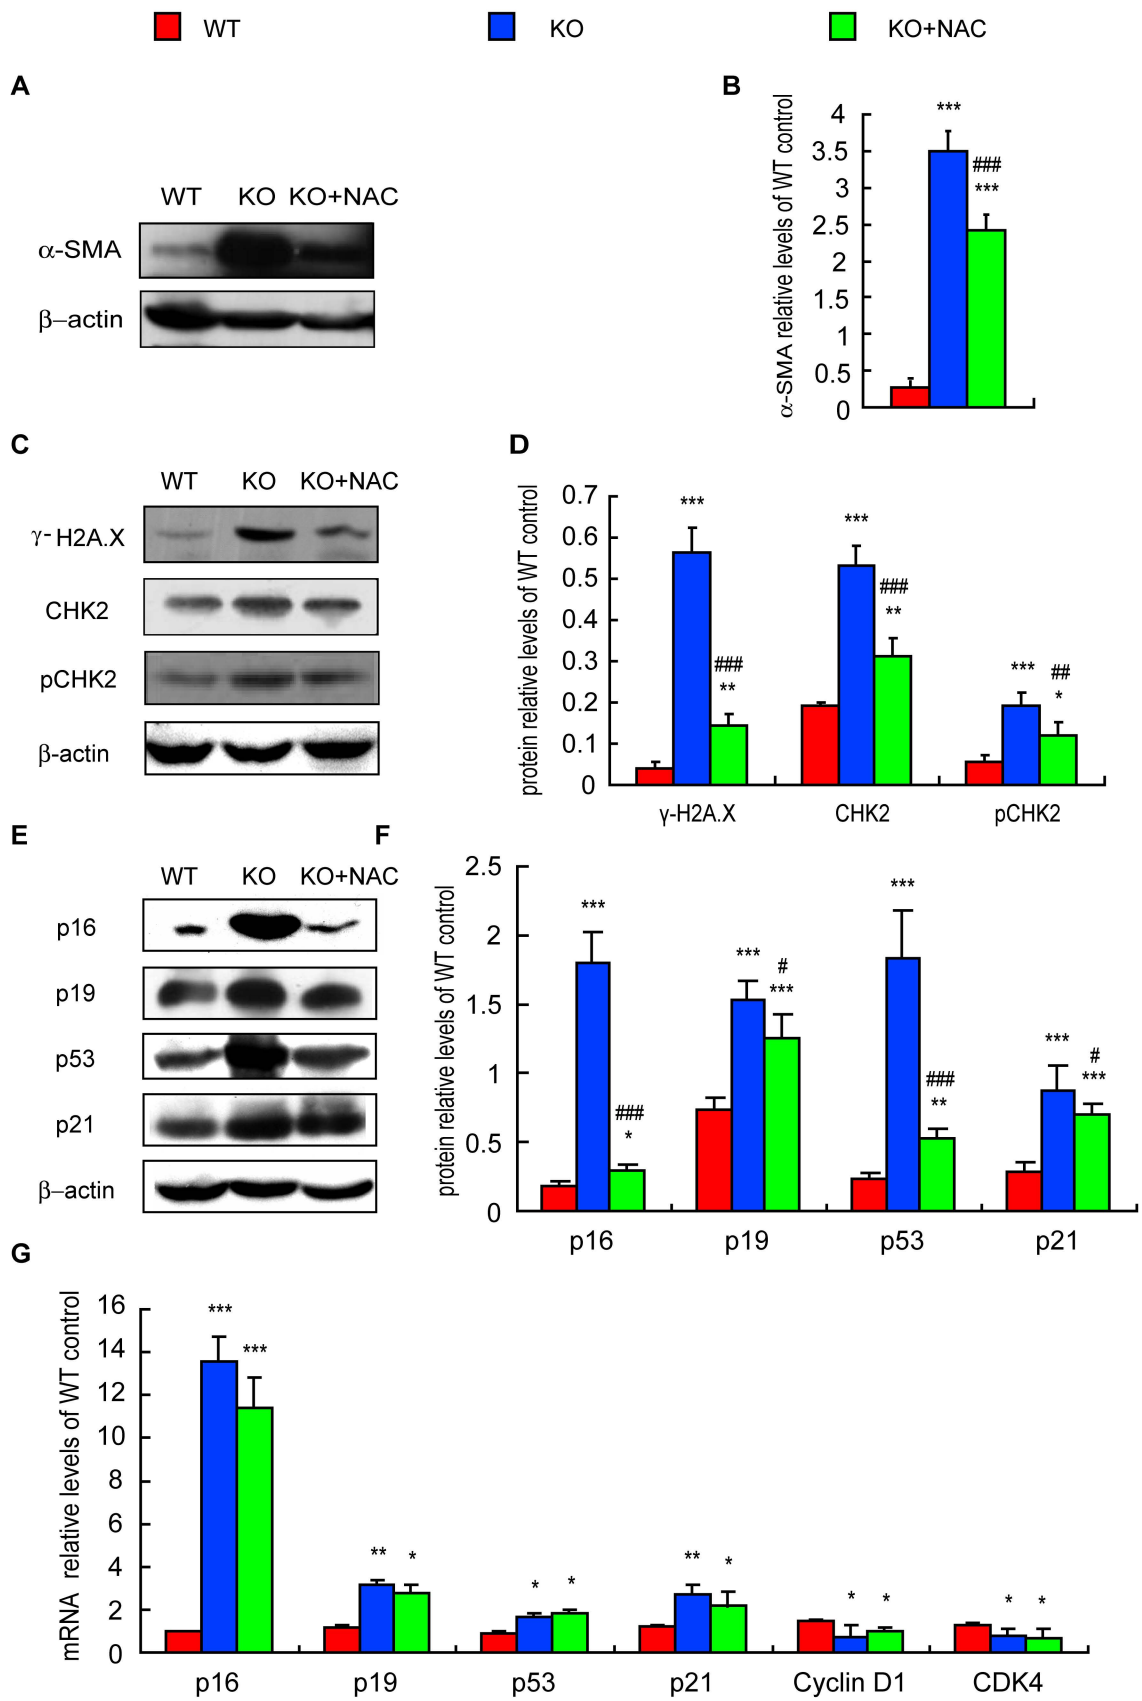

**Figure S2**

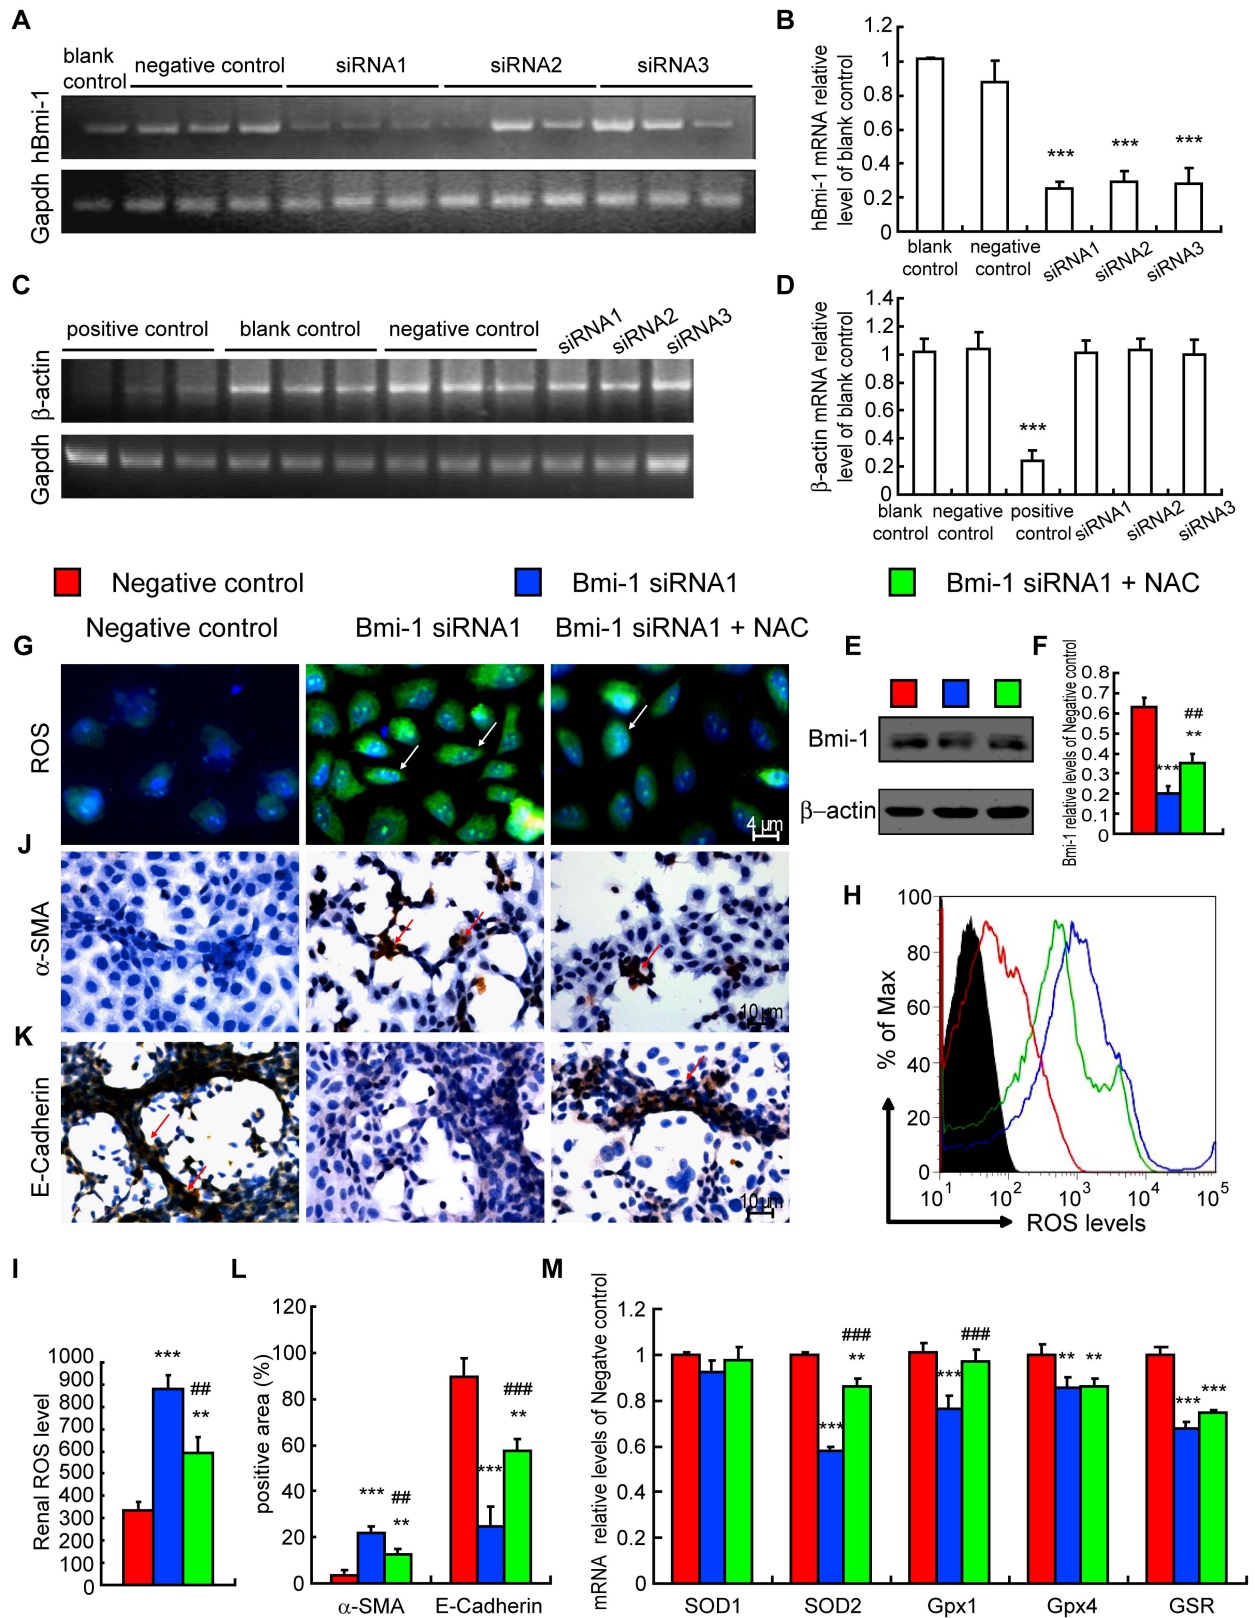

**Figure S3**

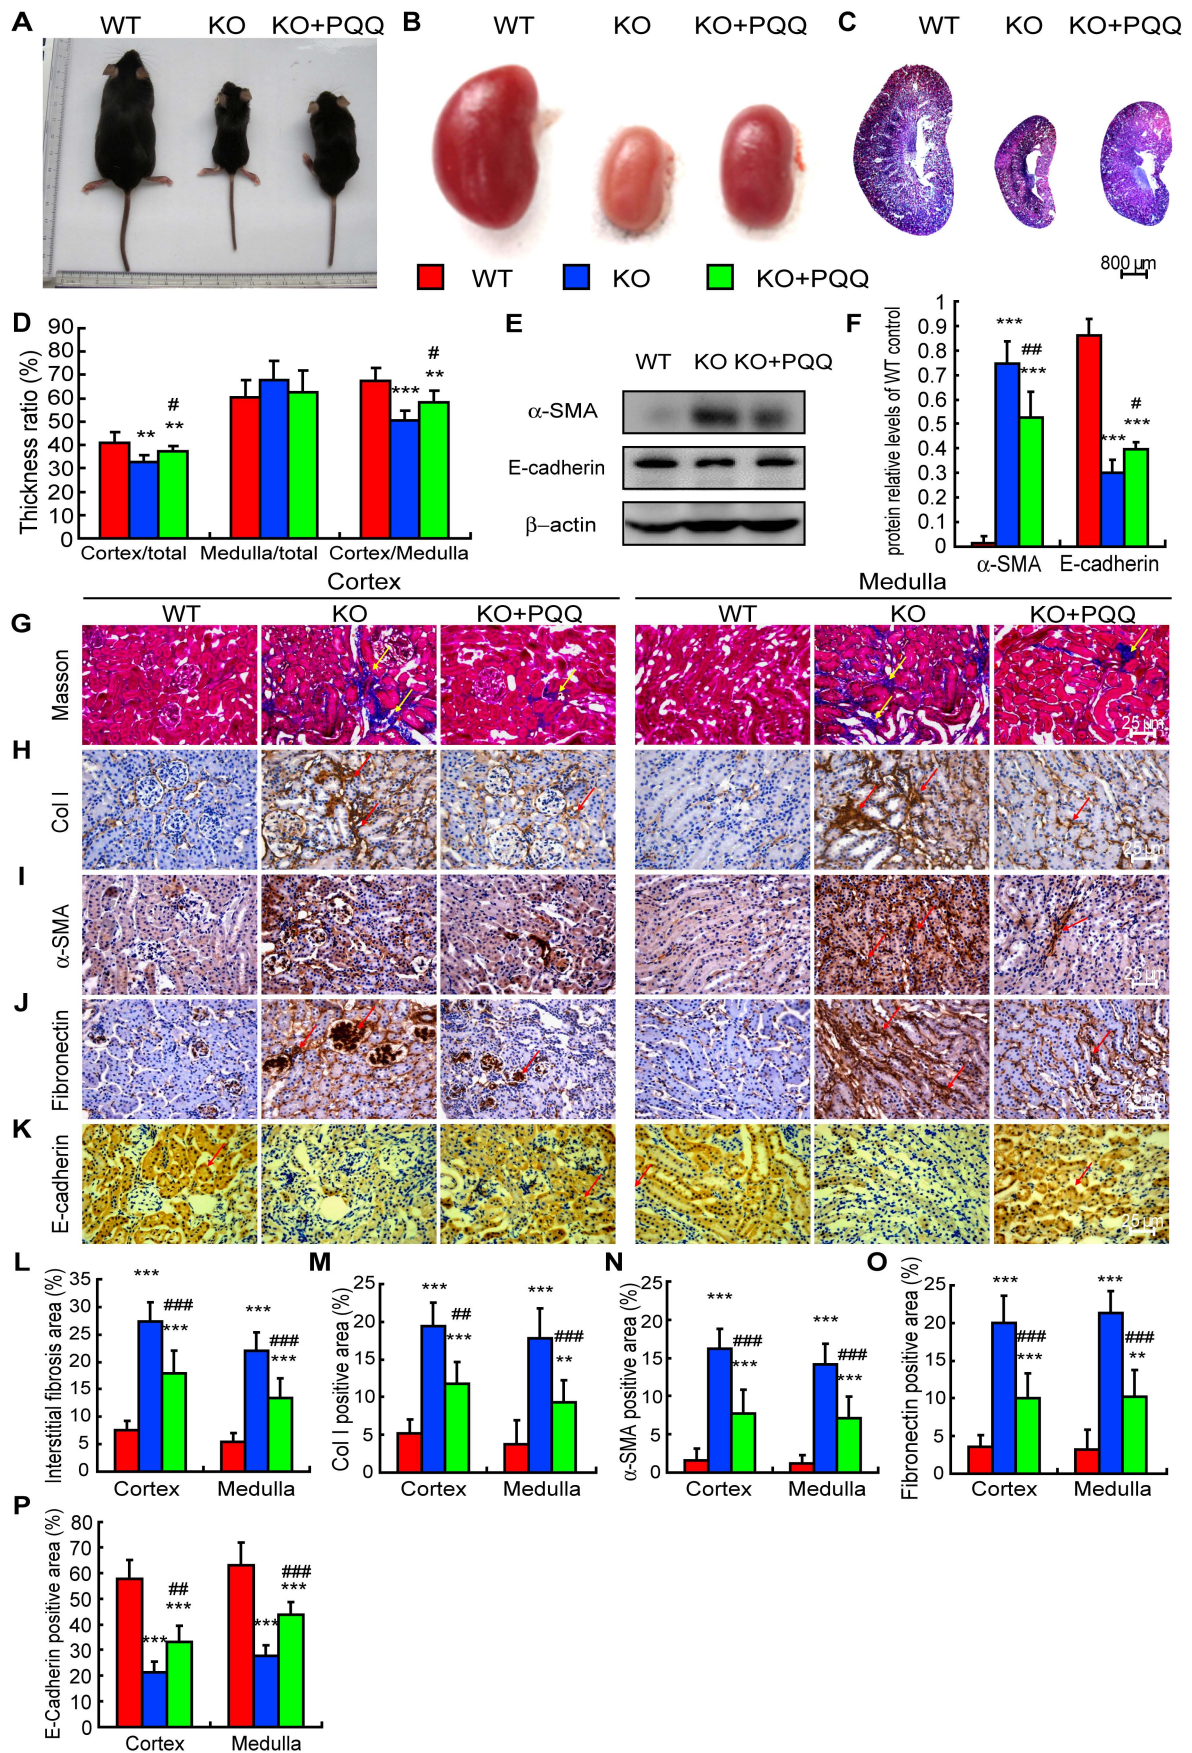

**Figure S4**

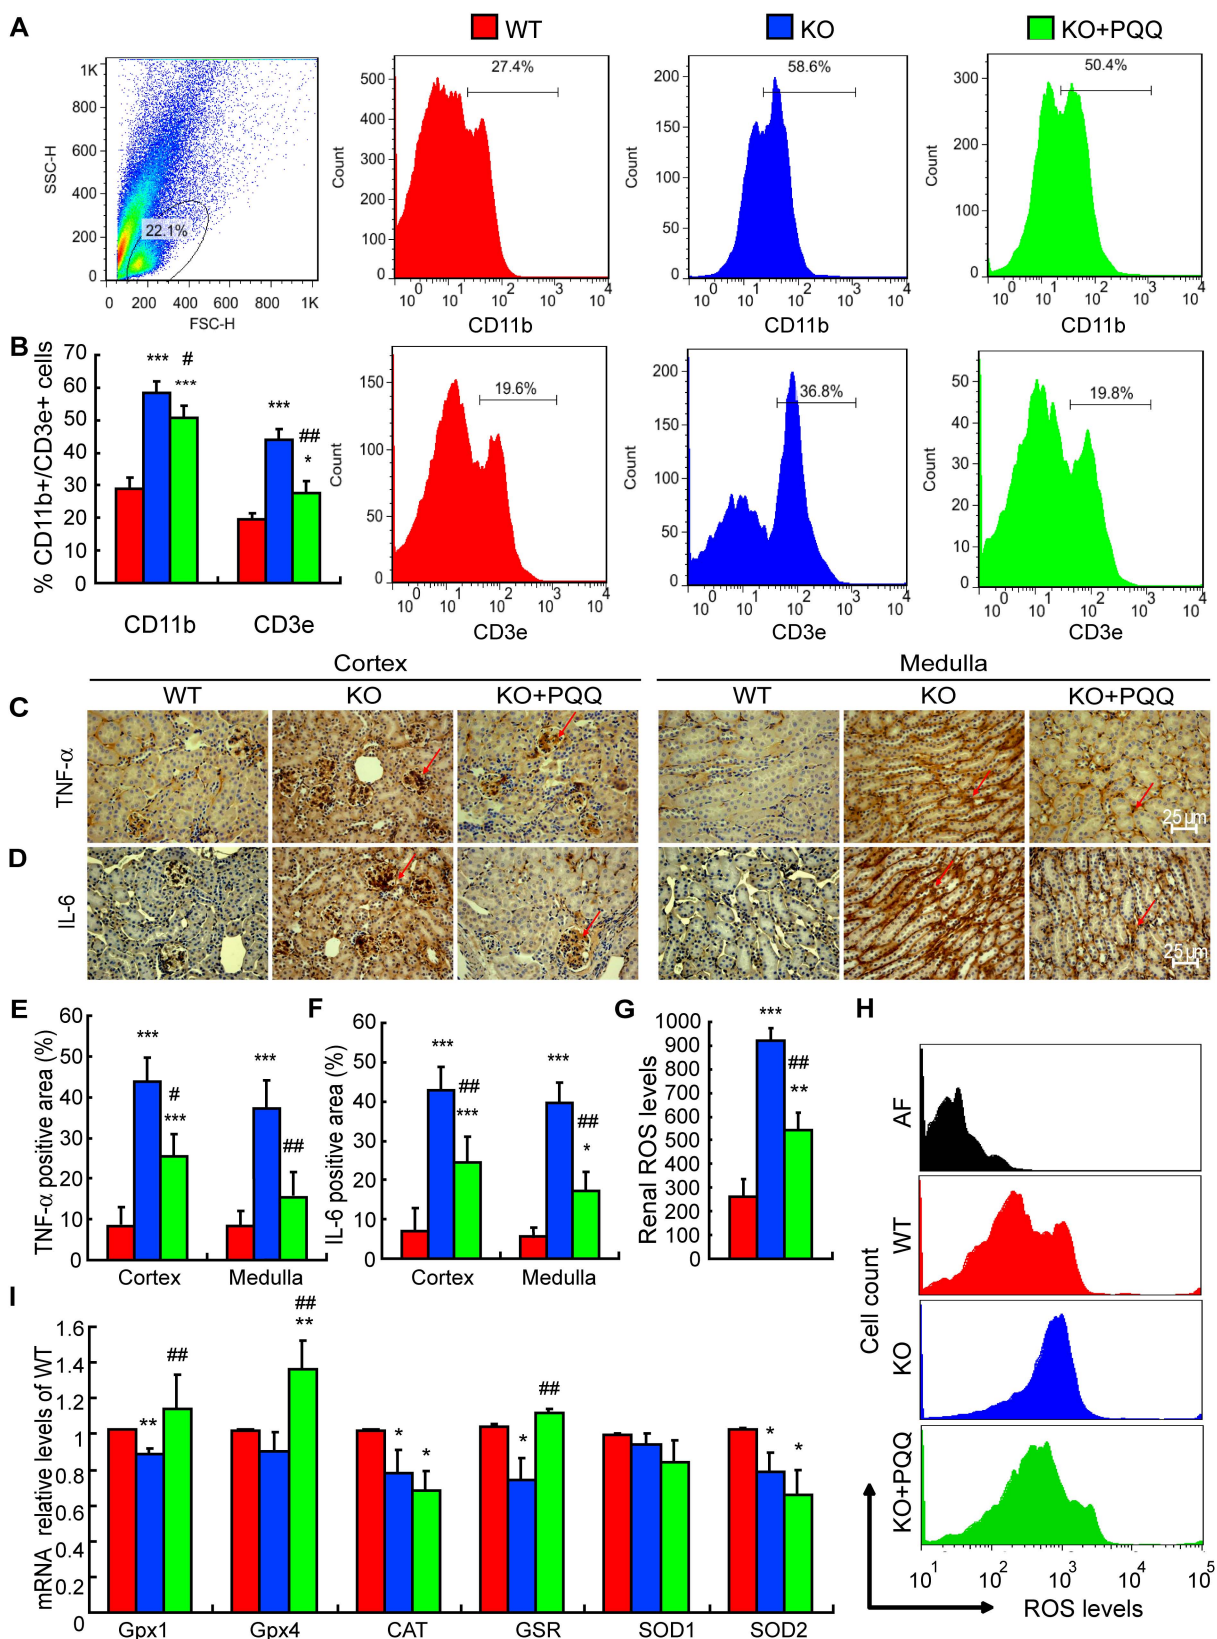

Figure S5

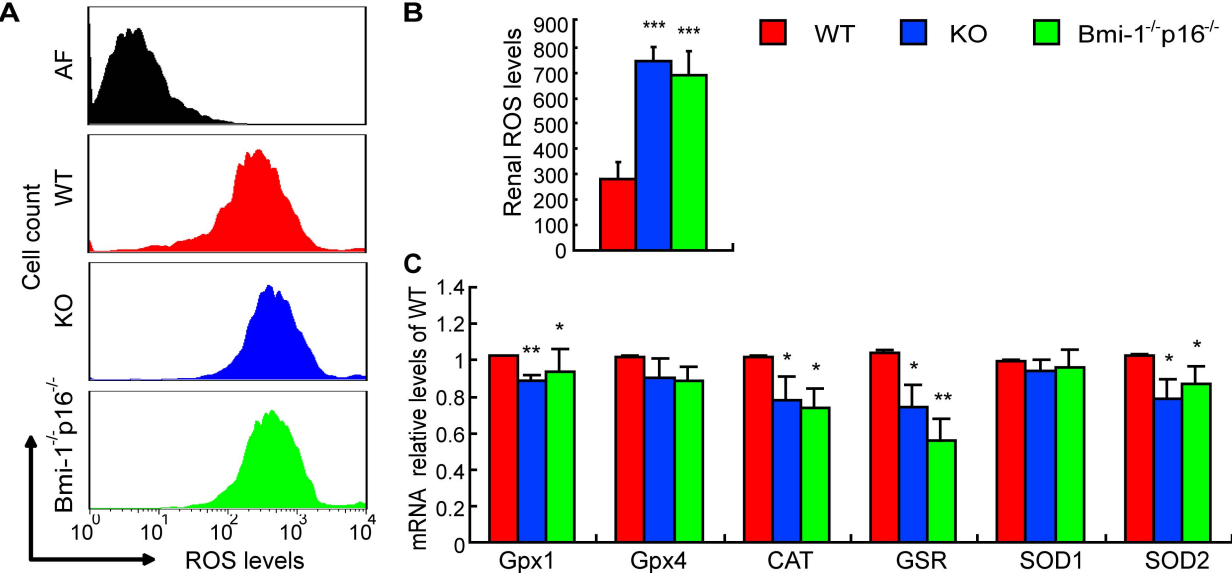

Supplement: acel0013-0797-sd1.pdf [file acel0013-0797-sd1.pdf]
